# Supplementary material
Source: MDPI journal article supplement (https://www.mdpi.com/2813-3137/1/1/5)
Supplement: s1 [file s1]

## Supplemental Materials

### Synthesis of BODIPY-TKI conjugates and investigation of their ability for targeting the Epidermal Growth Factor Receptor

**Simran Dhingra<sup>1</sup>, Prajesh Shrestha<sup>2,3</sup>, Arpan Chowdhury<sup>2,3</sup>, Zehua Zhou<sup>1</sup>, Seetharama D. Jois<sup>2,3,\*</sup>, and Maria da Graça H. Vicente<sup>1,\*</sup>**

<sup>1</sup> Department of Chemistry, Louisiana State University, Baton Rouge, LA, 70803, USA

<sup>2</sup> Department of Pathobiological Sciences, School of Veterinary Medicine, Louisiana State University, Baton Rouge, LA, 70803, USA

<sup>3</sup> School of Basic Pharmaceutical and Toxicological Sciences, College of Pharmacy, University of Louisiana at Monroe, Monroe, LA 71201, USA

\* Correspondence: [sjois@lsu.edu](mailto:sjois@lsu.edu); [vicente@lsu.edu](mailto:vicente@lsu.edu); Tel.: +1-225-578-7405; Fax: +1-225-578-3458

#### TABLE OF CONTENTS

|                                                                                              |    |
|----------------------------------------------------------------------------------------------|----|
| Figures S1-S3: <sup>1</sup> H NMR Spectra.....                                               | S2 |
| Figures S4-S7: Spectroscopic Data.....                                                       | S3 |
| Figures S8-S10: HRMS Data .....                                                              | S6 |
| Figure S11: Docked structure of erlotinib overlapped with the crystal structure of EGFR..... | S7 |
| Figure S12: SPR of lapatinib binding to EGFR.....                                            | S7 |
| Figure S13: Lapatinib inhibition of EGFR Lapatinib.....                                      | S8 |
| Figure S14: Cytotoxicity in human HEP2 cells.....                                            | S8 |

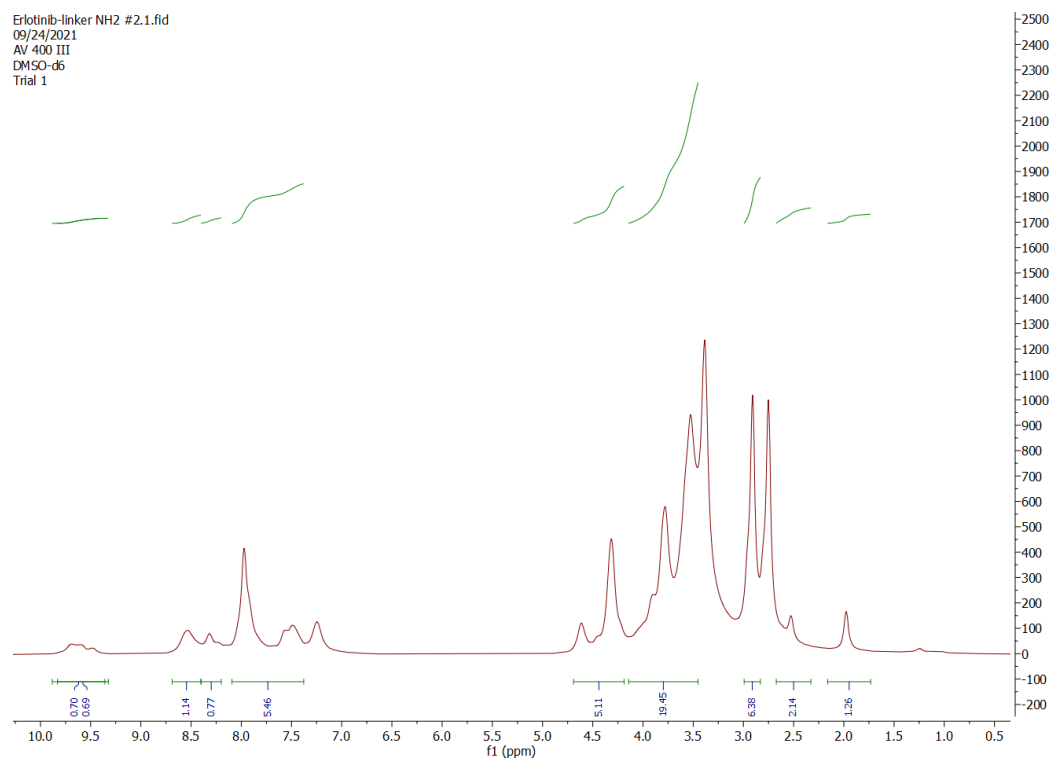

**Figure S1.**  $^1\text{H}$  NMR of compound 4

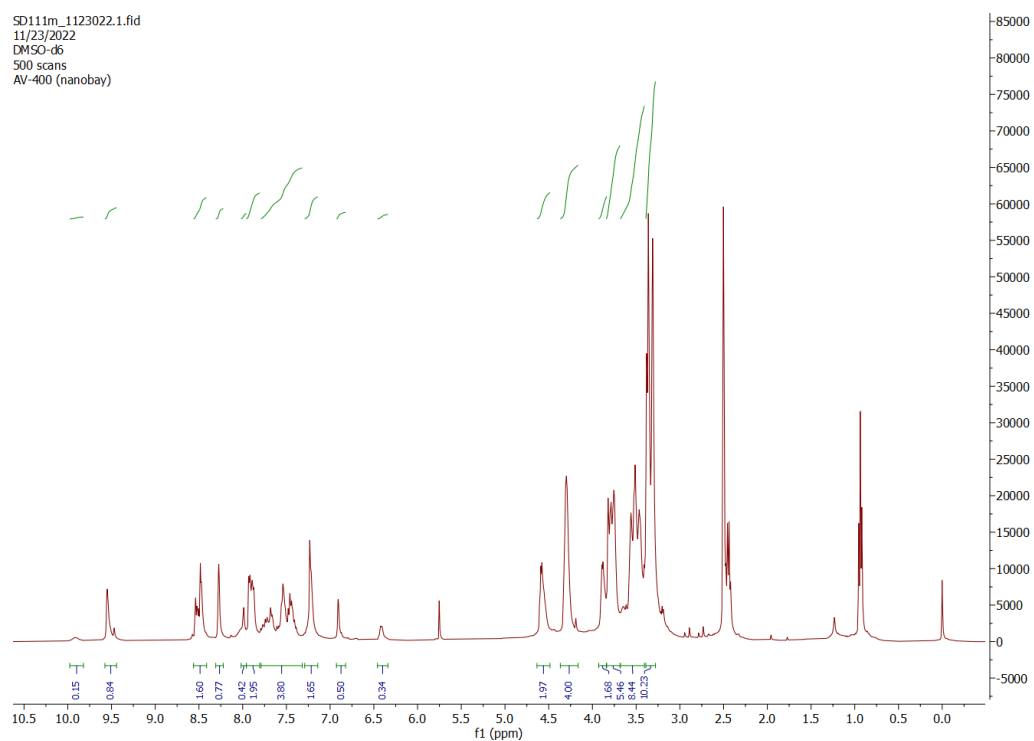

**Figure S2.**  $^1\text{H}$  NMR of conjugate 5

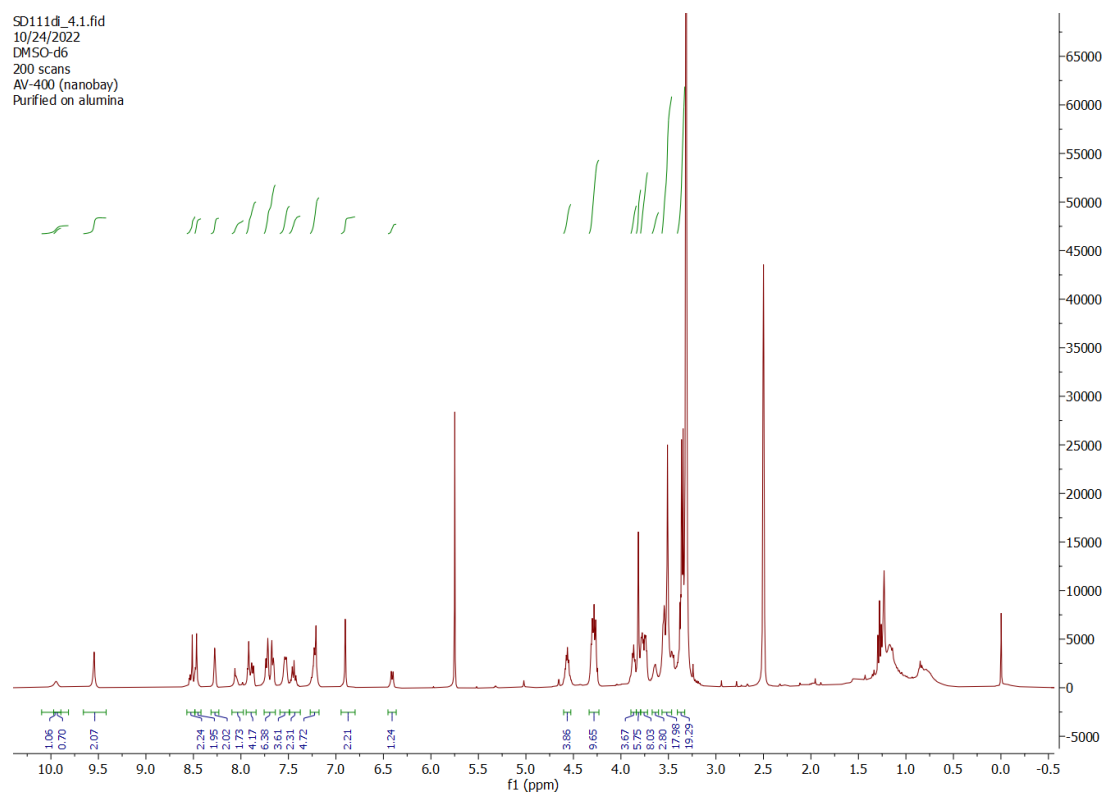

**Figure S3.**  $^1\text{H}$  NMR of conjugate **6**

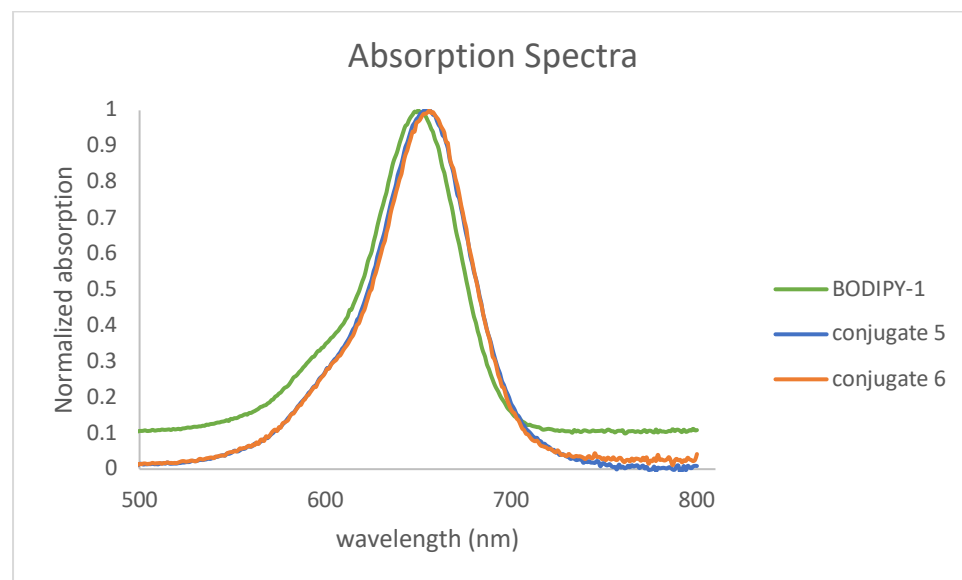

**Figure S4.** Normalized UV-Vis absorption spectra of BODIPY **1** and conjugates **5**, **6** in DMSO

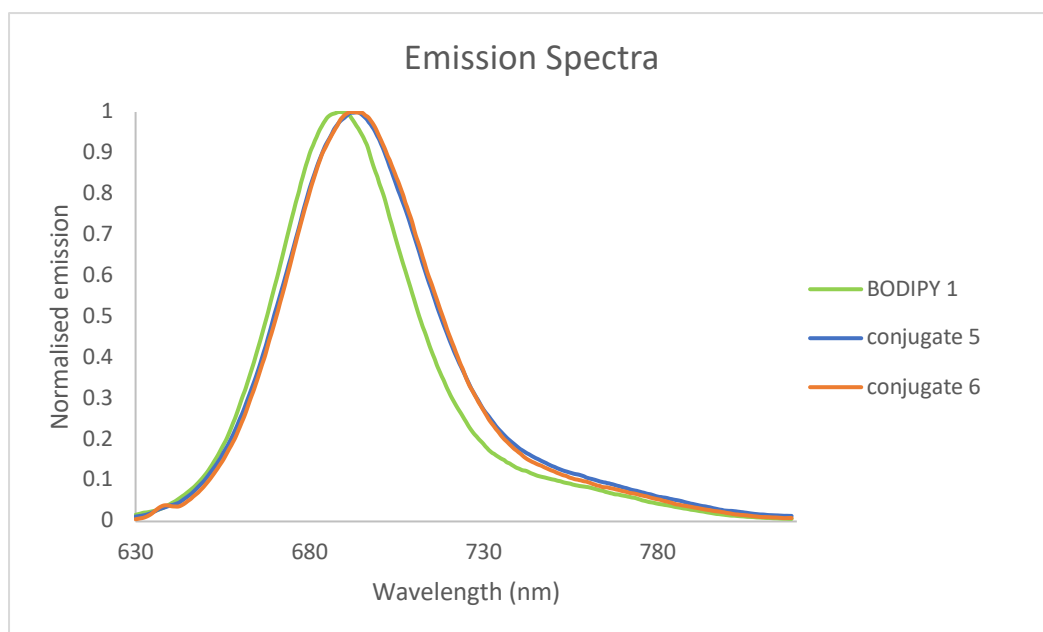

**Figure S5.** Normalized fluorescence emission spectra of BODIPY **1** and conjugates **5**, **6**

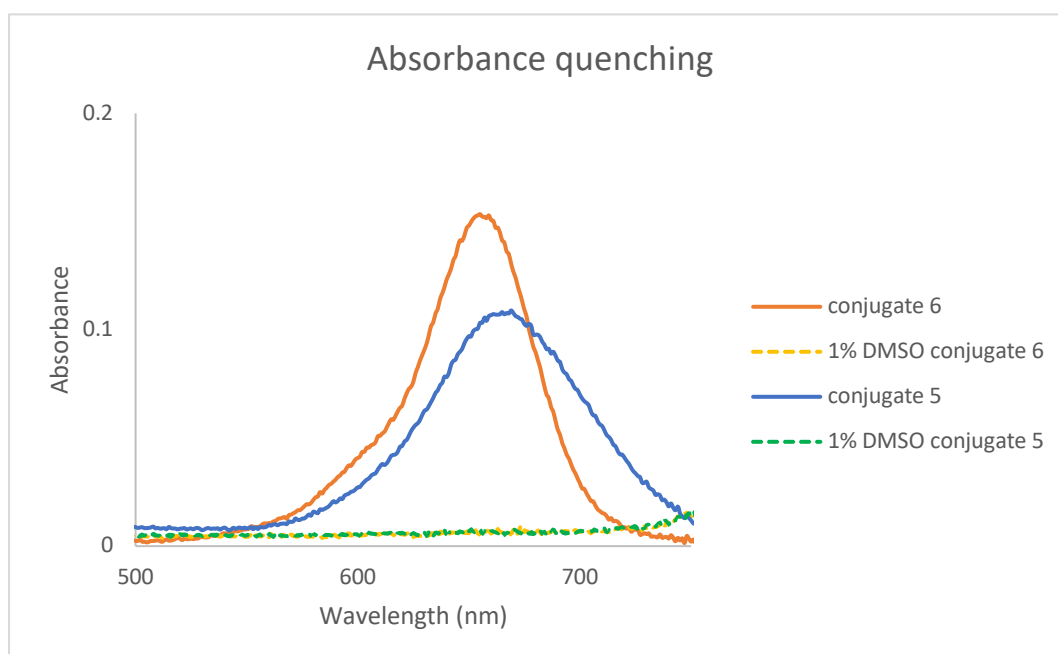

**Figure S6.** UV-Vis spectra of conjugates **5** and **6** at  $1 \times 10^{-5}$  M in a) DMSO solution (solid line), b) freshly prepared HEPES buffer solution containing 1% DMSO solution (dashed line)

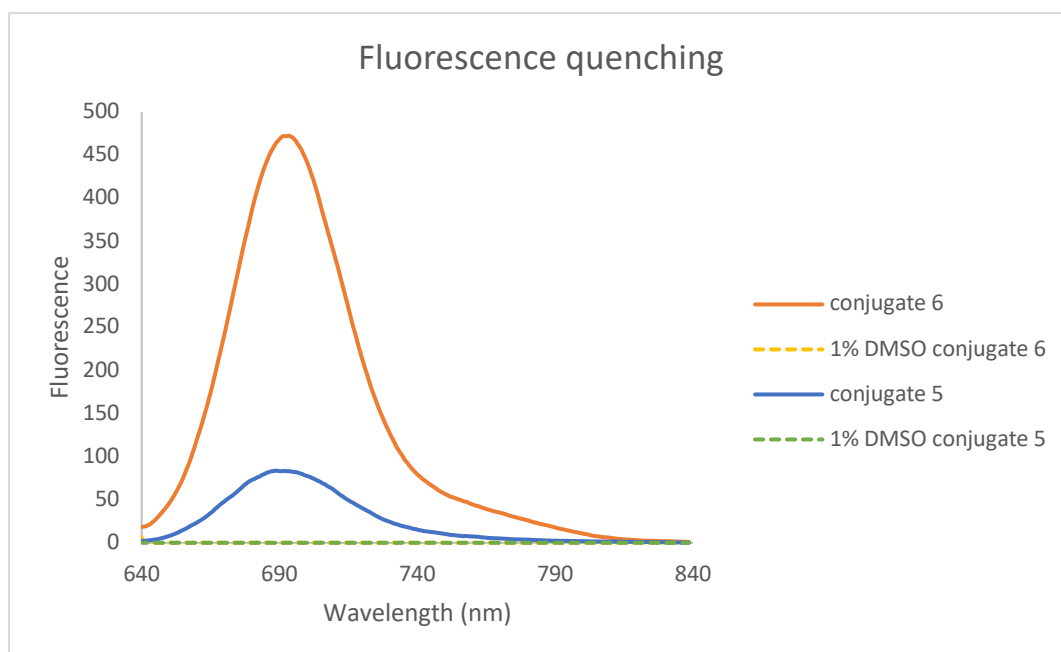

**Figure S7.** Fluorescence emission spectra of conjugates **5** and **6** at  $1 \times 10^{-5}$ M in a) DMSO solution (solid line), b) freshly prepared HEPES buffer solution containing 1% DMSO solution (dashed line)

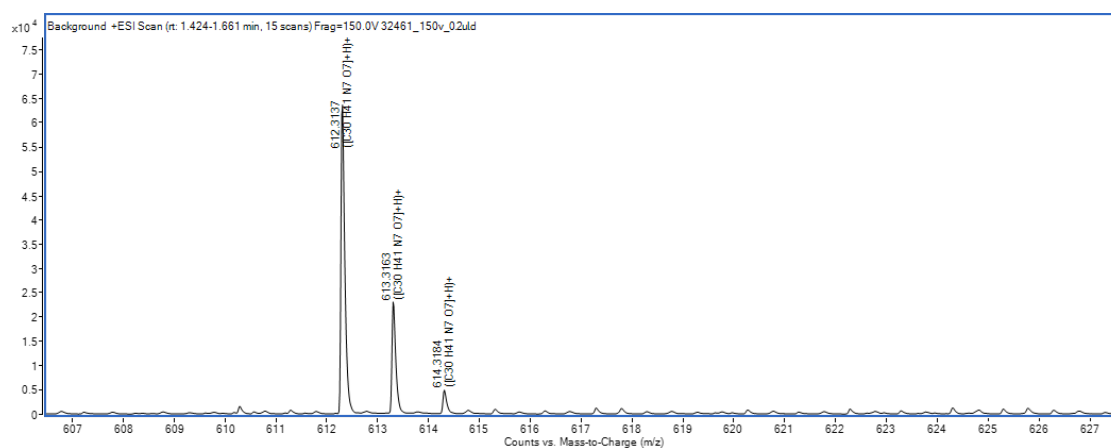

**Figure S8.** High-resolution mass spectrum (ESI-TOF) of compound **4**

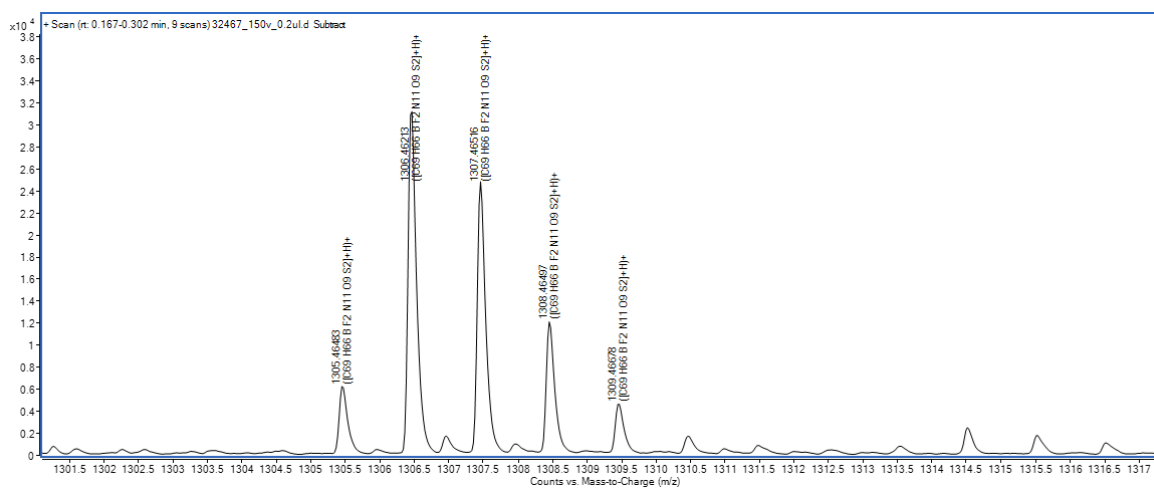

**Figure S9.** High-resolution mass spectrum (ESI-TOF) of conjugate **5**

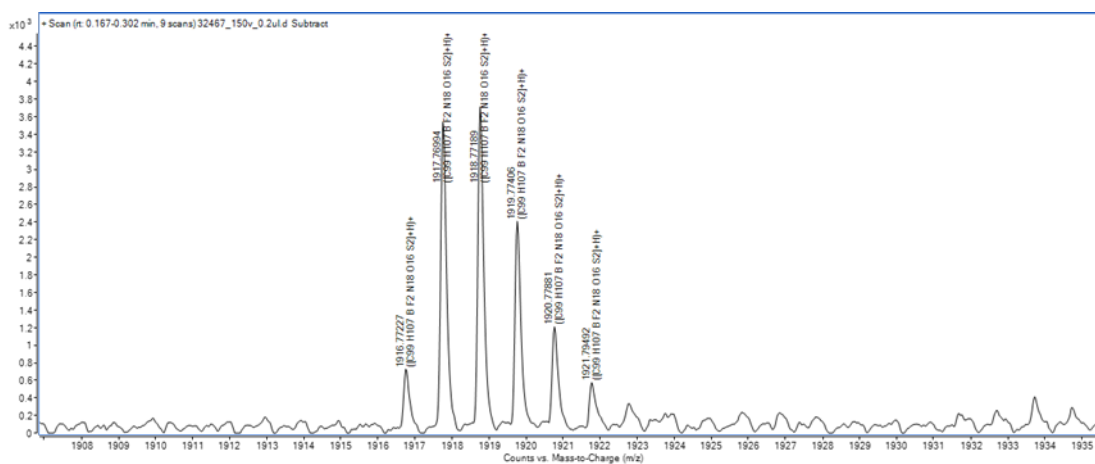

**Figure S10.** High-resolution mass spectrum (ESI-TOF) of conjugate **6**

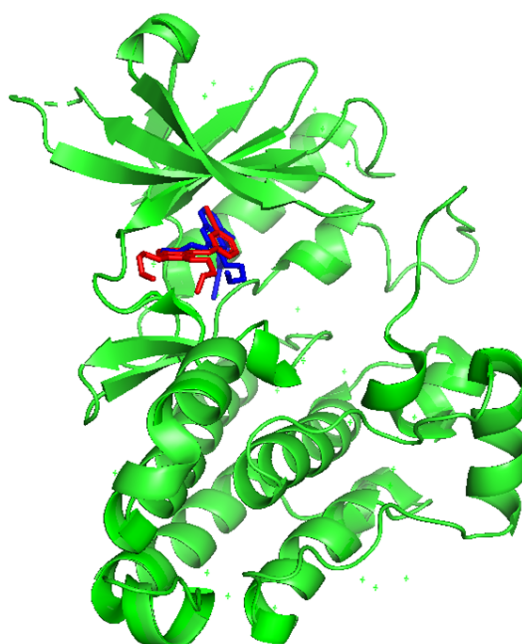

**Figure S11.** Low energy docked structure of erlotinib overlapped with the crystal structure of erlotinib EGFR kinase complex (PD ID: 4hjo). Red sticks, crystal structure of erlotinib, blue, docked structure of erlotinib.

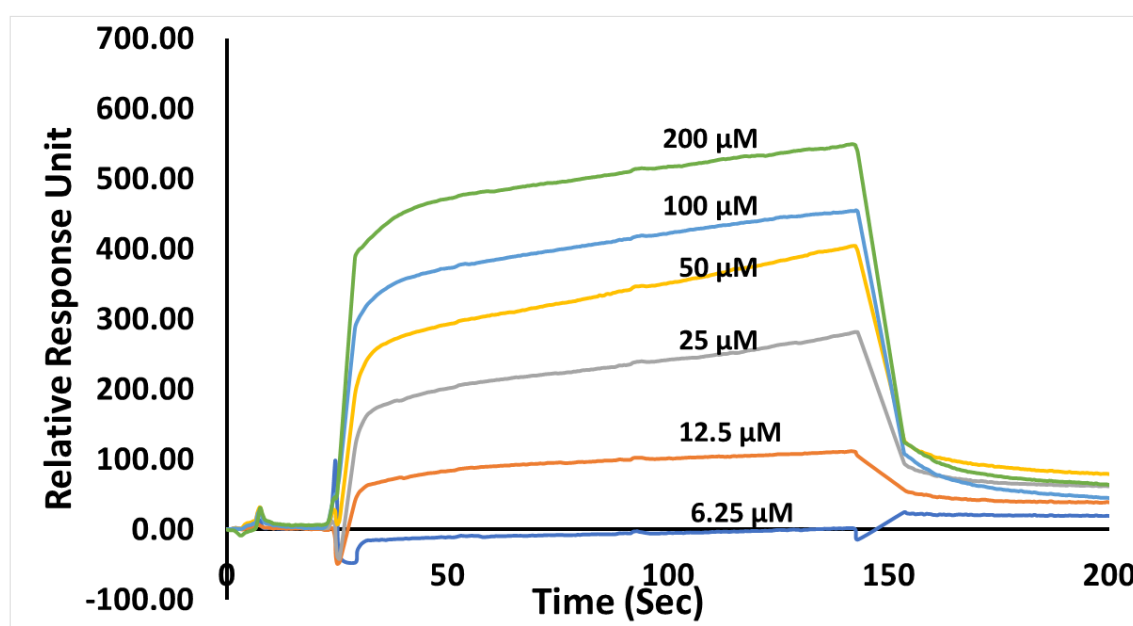

**Figure S12.** SPR analysis of binding of lapatinib a TKI to EGFR kinase domain is used as a positive control to evaluate the binding conjugates to EGFR kinase. Lapatinib is a kinase inhibitor of EGFR/HER2.

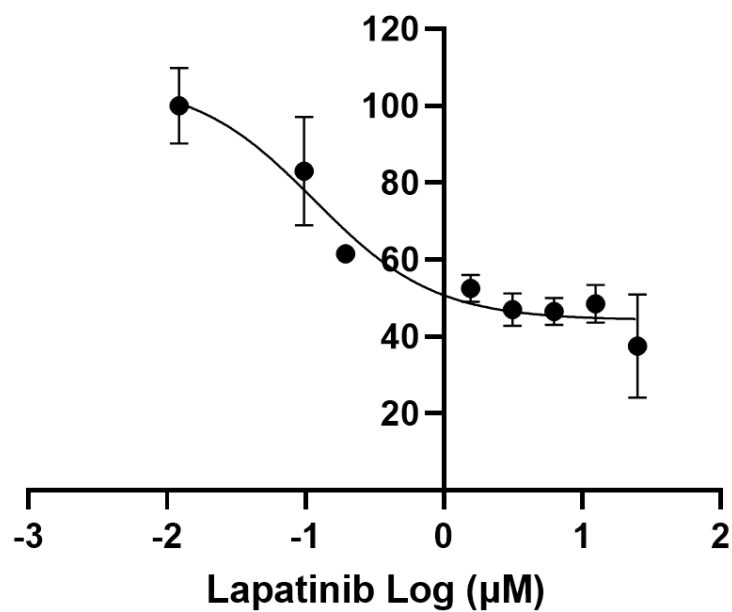

**Figure S13.** Inhibition of EGFR kinase activity assessed by kinase activity kit. Lapatinib is a known EGFR/HER2 kinase activity inhibitor. Dose dependent inhibition of kinase activity was observed.

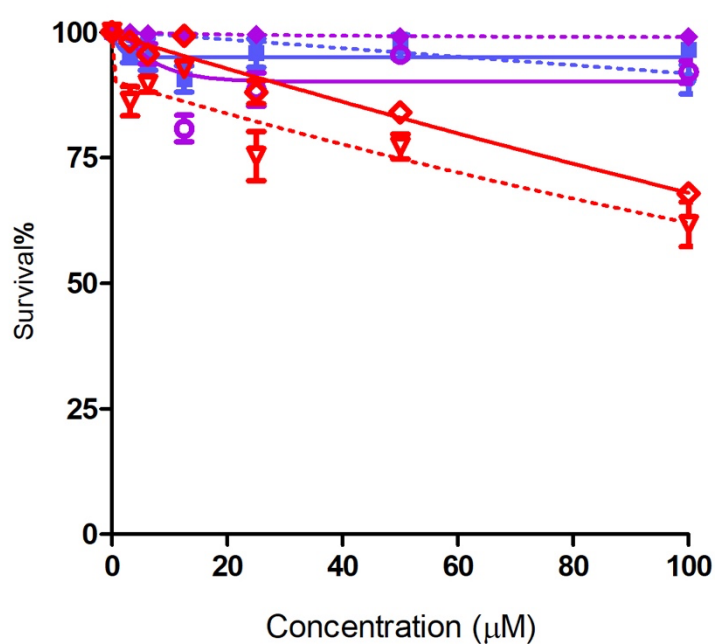

**Figure S14.** Dark (full line) and photocytotoxicity ( $1.5 \text{ J/cm}^2$ , dashed line) of BODIPY 1 (purple), conjugate 5 (red), and conjugate 6 (blue) in human HEp2 cells using a Cell Titer Blue assay.
